# Supplementary material for: Urban–Rural Disparities in the Magnitude and Determinants of Stunting among Children under Five in Tanzania: Based on Tanzania Demographic and Health Surveys 1991–2016
Source: MDPI journal article supplement (doi:10.3390/ijerph18105184), 2021-05-13
Supplement: s1 [file s1]

# Supplementary material

**Table S1. Prevalence of stunting among under-5 children in the rural and urban areas based on 1991-2016 Tanzania Demographic and Health Surveys.**

| Region,<br>prevalence %<br>(95%CI) | 1991-1992          | 1996               | 1999               | 2004-2005          | 2009-2010          | 2015-2016          | $\chi^2$ for<br>trend | P      |
|------------------------------------|--------------------|--------------------|--------------------|--------------------|--------------------|--------------------|-----------------------|--------|
| Rural                              | 50.48(49.15,51.80) | 52.12(50.71,53.52) | 52.66(50.51,54.80) | 46.71(45.46,47.97) | 44.62(43.31,45.92) | 38.26(37.08,39.43) | 290.39                | <0.001 |
| Urban                              | 46.80(43.98,49.63) | 40.79(37.79,43.80) | 29.09(24.70,33.47) | 35.44(32.89,37.98) | 32.11(29.60,34.62) | 25.65(23.85,27.45) | 167.58                | <0.001 |
| Total                              | 49.81(48.61,51.01) | 50.13(48.85,51.41) | 48.74(46.78,50.70) | 44.64(43.51,45.77) | 42.21(41.04,43.37) | 35.01(34.01,36.01) | 481.63                | <0.001 |

CI, confidence interval.
